# Supplementary material for: Shape optimization and sensitivity of compliant beams for prescribed load-displacement response
Source: Copernicus journal article supplement (doi:10.5194/ms-7-219-2016), 2016-11-17
Supplement: Supplementary file [file ms-7-219-2016-supplement-title-page.pdf › ms-7-219-2016-supplement-title-page.pdf]

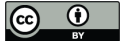

## *Supplement of*

# **Shape optimization and sensitivity of compliant beams for prescribed load-displacement response**

**G. Radaelli and J. L. Herder**

*Correspondence to:* Giuseppe Radaelli (g.radaelli@tudelft.nl)

- ms-7-219-2016-supplement-title-page.pdf
- Supplementary data
  - Example1endpoint\_energy.fig
  - Example1endpoint\_shape.fig
  - Example1startpoint\_energy.fig
  - Example1startpoint\_shape.fig
  - Example2endpoint\_energy.fig
  - Example2endpoint\_shape.fig
  - Example2startpoint\_energy.fig
  - Example2startpoint\_shape.fig
  - FDcomparison.fig
  - optimplotfval\_alltogether.fig
  - optimplotfval\_alltogether2.fig

The copyright of individual parts of the supplement might differ from the CC-BY 3.0 licence.
